# Supplementary material for: Anthracene as a sensitiser for near-infrared luminescence in complexes of Nd(iii), Er(iii) and Yb(iii): an unexpected sensitisation mechanism based on electron transfer
Source: Royal Society of Chemistry journal article supplement (doi:10.1039/b700714k), 2007-01-01
Supplement: b700714k.pdf [file b700714k.pdf]

# Anthracene as a sensitizer for near-infrared luminescence in complexes of Nd(III), Er(III) and Yb(III): an unexpected sensitization mechanism based on electron transfer

Theodore Lazarides, Mohammed A. H. Alamiry, Harry Adams, Simon J. A. Pope, Stephen Faulkner, Julia A. Weinstein and Michael D. Ward

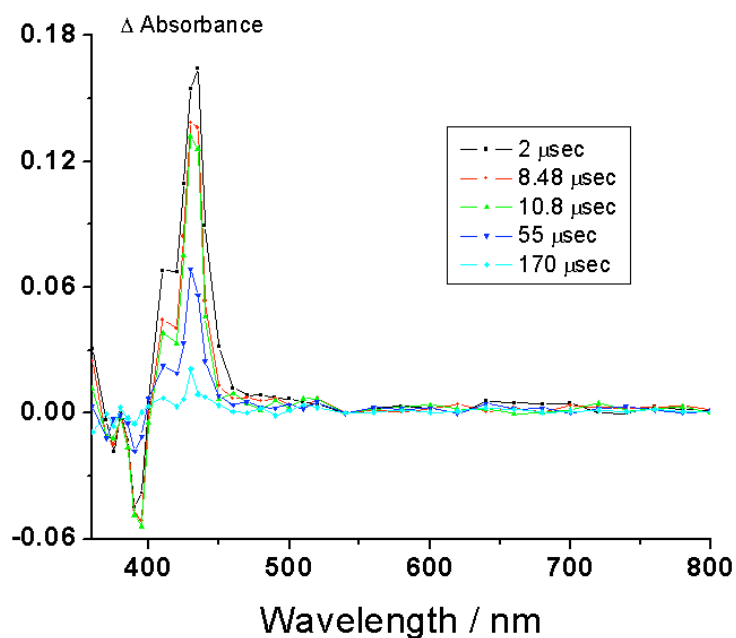

Figure S1. Transient absorption spectrum of [Gd(hfac)<sub>3</sub>(L<sup>1</sup>)] in degassed toluene at RT, recorded at different time delays following 355 nm excitation pulse.
